# Supplementary material for: Energy recovery from concentrated seawater brine by thin-film nanofiber composite pressure retarded osmosis membranes with high power density
Source: Royal Society of Chemistry journal article supplement (doi:10.1039/c3ee23349a), 2013-01-01
Supplement: c3ee23349a.pdf [file c3ee23349a.pdf]

## Supporting information

### Energy recovery from concentrated seawater brine by thin-film nanofiber composite pressure retarded osmosis membranes with high power density

*Xiaoxiao Song, and Zhaoyang Liu\* and Darren Delai Sun \**

*School of Civil and Environmental Engineering, Nanyang Technological University, 639798  
(Singapore)*

\*Please address correspondence to either author. Z.Y.Liu: E-mail: [zyliu@ntu.edu.sg](mailto:zyliu@ntu.edu.sg); Tel: +65 8298 7689; Fax: +65 6791 0676. D.D.Sun: E-mail [ddsun@ntu.edu.sg](mailto:ddsun@ntu.edu.sg); Tel: +65 67906273; Fax: +65 6791 0676.

The supporting information includes 16 pages (S1-S17) and 8 images (Figure S1-S8).

## 1 **Determination of membrane intrinsic parameters and salt rejection**

2 Pure water permeability ( $A$ ) is determined by a bench scale cross-flow RO unit  
3 (SEPA CF II, GE, 140 cm<sup>2</sup> effective area).<sup>1</sup> Spacers (sterlitech, Sepa CF feed spacer,  
4 17 mil) were inserted. The cross-flow was maintained at 15.4 cm s<sup>-1</sup>. The loaded  
5 membrane was subject to pure water compaction at 10 Bar for at least 3 h. Then the  
6 pressure was lowered to a series of values ( $\Delta P$ ) and the corresponding water flux  $J_W$   
7 was measured. The  $A$  can be obtained by dividing  $J_W$  with  $\Delta P$  ( $J_W = A * \Delta P$ ).<sup>2</sup>

8 The salt permeability ( $B$ ) and structure parameter ( $S$ ) was determined based on water  
9 flux,  $J_W$ , and solute flux,  $J_S$ , in FO configuration. 0.5 M NaCl and DI water was  
10 employed as draw solution and feed solution respectively. A custom-built rectangular  
11 acrylic plastic FO module nailed by 6 screws (3 on long side and 2 on short side).  
12 Two rubber O-rings are used to seal the channels. The depths of channels on the feed  
13 and draw solutions side are 2mm. The module has an effective membrane area of  
14 23.8 cm<sup>2</sup>. Cross-flow velocities at both feed solution and draw solution sides were  
15 maintained by gear pump (cole-palmer) at 16.7 cm s<sup>-1</sup>. Spacers (Sepa CF feed spacer,  
16 17 mil) were set in the 2 mm deep channels on both sides inside. While equilibrium  
17 was reached, the conductivity and weight change of feed and draw solutions were  
18 monitored with 2 minutes intervals. The  $C_{F,b}$  and  $J_W$  can be derived from the  
19 monitored data.<sup>1</sup> According to mass balance equation:

$$20 \quad C_{F,b}(V_0 - J_W * A_m * t) = C_{F,b0} * V_0 + J_S * A_m * t \quad (S1)$$

1    Wherein  $C_{F,b}$  is the bulk feed solute concentration at time  $t$ .  $V_0$  is the original feed  
2    solution volume.  $J_w$  is the measured water flux,  $A_m$  is the membrane area and  $C_{F,b0}$  is  
3    the original bulk feed solute concentration.  $J_s$  is the solute flux, which is rewritten as:<sup>3</sup>

$$4 \qquad J_s = B * C_{D,b} * \exp(-J_w S / D) \qquad (S2)$$

5    Wherein  $C_{D,b}$  is the bulk draw solute (NaCl) concentration,  $D$  is the solute diffusion  
6    coefficient.<sup>4</sup>  $S$ , the membrane structure parameter, can be calculated from.<sup>5</sup>

$$7 \qquad S = \left( \frac{D}{J_w} \right) * \ln((B + A * \pi_{D,b}) / (B + J_w)) \qquad (S3)$$

8    Wherein  $\pi_{D,b}$  is the osmotic pressure of bulk draw solute (NaCl). The above equation  
9    S1, S2 and S3 have three unknown variables, thus  $J_s$ ,  $B$  and  $S$  can be solved.

10    The test conditions for determination of salt rejection,  $R$ , were as follows: Feed  
11    solution=50mM NaCl. Applied pressure=15 Bar. Cross Flow Velocity=15.4 cm/S.  
12    The Sterlitech high foulant feed spacer and permeate carrier spacer were inserted on  
13    the feed solution side and permeate solution side, respectively. Test temperature was  
14    at 25 °C. Then concentrated NaCl solution (2 M) was added to the feed tank to adjust  
15    total feed concentration to be 50 mM. When the permeate water flux became  
16    stabilized, the samples were collected from permeate outlet and concentrate outlet  
17    collected and determined using conductivity meter. The concentration thus calculated  
18    was used as  $C_p$  and  $C_f$  respectively. The rejection,  $R$ , can be calculated by the  
19    equation  $(1 - C_p / C_f)$  in a typical RO process.

## 1    **Determination of PRO water flux**

2    The schematic diagram of the PRO system is shown in Figure S2. The stainless-steel  
3    membrane module, which was a modified version of a commercial cross flow cell  
4    (GE SEPA II, Osmonics) has an effective area of  $140\text{ cm}^2$ .<sup>22</sup> The unit was working  
5    with spacers (sterlitech feed spacers, diamond) inserted within the 2mm deep flow  
6    channel on both draw and feed solution sides. The flow scheme was counter-current.  
7    The feed solution was circulated at a flow rate of  $0.8\text{ L min}^{-1}$  with a variable-speed  
8    gear pump (Cole Parmer). The draw solution was pressurized with a high pressure  
9    pump (Hydra-cell pump) and circulated at a flow rate of  $0.8\text{ L min}^{-1}$ . The frequency  
10   of the pump and a valve at the outlet of the membrane module controls the hydraulic  
11   pressure and cross flow velocity respectively. A customized water bath was use to  
12   control the temperature of both feed and draw solutions constantly at  $25 \pm 1^\circ\text{C}$ .  
13   The PRO experiment was conduct with 4 liters synthetic seawater brine (SB) as draw  
14   solution and 1 liter brackish water (BW) or river water (RW) feed solution,  
15   respectively. The TNC-PRO membranes were placed in the membrane module with  
16   selective layer facing draw solution. To ensure the membrane is conditioned to the  
17   maximum pressure, we pre-run the membrane with 15.2 Bar with pure water, then  
18   concentrated draw solution were added into the draw solution circuit to adjust the  
19   overall draw solution concentration to be 1.06 M. After the temperature and the flux  
20   became stabilized, the weight of the digital balance is recorded every 2 minutes. And  
21   the averaged  $J_w$  is calculated based on 5 data points every 10 minutes. The  $\Delta P$  is  
22   reduced to 13.3, 10.2, 8.8, 7.5, 5.8, 4.9, 3.8, 2.5 and 0 Bar stepwise and the respective

1  $J_W$  is recorded. Thus, for each of the TNC-PRO membranes, the series of  $J_W$  has 10  
2 data points, corresponding to the above  $\Delta P$ .

### 3 **Significance of performance limiting factors for TNC-2 membrane (BW-SB)**

4 While accounting for ECP, ICP, and RSP, the modeling of Equation 3 and 4 suggests  
5 that  $\Delta C_m$  is substantially lower than the nominal solute concentration difference  
6 between the feed and draw solutions. The reduction of  $\Delta C_m$  then translates into loss of  
7  $J_W$  and  $W$ . For all TNC-PRO membranes, the experimental  $J_W$  fits well with the  
8 projected  $J_W$  using this model (upper plot in Figure 3 in main text). The successful  
9 prediction of  $J_W$  by this model for phase-inversion PRO membranes and commercial  
10 PRO membranes were also reported in a previous study.<sup>43</sup> In Figure S5, the realistic  
11  $W$  curve,  $W_{real}$ , and ideal  $W$  curve,  $W_{ideal}$ , for TNC-2 membrane working in BW-SB  
12 configuration is represented by black curve and grey dotted curve, respectively. By  
13 assuming the elimination of the RSP ( $B/J_W^*[\exp(J_W S/D)-\exp(-J_W/k)]=0$ ), ICP  
14 ( $\exp(J_W S/D)-1=0$ ) or ECP ( $1-\exp(-J_W/k)=0$ ), the  $W$  loss to each limiting phenomenon  
15 is restored. The resulted hypothesized  $W_{no-RSP}$ ,  $W_{no-ICP}$  and  $W_{no-ECP}$  curve is  
16 represented by the dashed green, red and blue curve respectively. The significance of  
17 each limiting phenomenon can be evaluated by comparing the according curve with  
18  $W_{real}$ . The bigger difference it shows, the more significant is the limiting effect of the  
19 according phenomenon. In this sense, the significance of the limiting phenomenon  
20 follow the order of ECP>ICP>RSP, as shown in Figure S5. To quantify the  
21 significance of each limiting phenomenon, the projected peak power density ( $W_p$ ) at

the top of the projected  $W$  curves are used as the benchmark value. The TNC-2 membrane is predicted to output the highest  $W_{p,real}$  of  $15.2 \text{ W m}^{-2}$  at a  $\Delta P$  of 22.6 Bar. Due to a synergistic limiting effect by ECP, ICP and RSP, this value is still far less than the ideal value,  $W_{p,ideal}$ . However, when the limiting effect of ECP, ICP or RSP is eliminated, the  $W_p$  is restored to  $W_{p,no-ECP}$ ,  $W_{p,no-ICP}$  and  $W_{p,no-RSP}$  respectively.

## **Derivation of Equation 5 (variable- $\Delta P$ model) for total energy recovery from seawater brine**

We assume that the rejection of the membrane for NaCl is 100% and no reverse salt permeation (RSP) happened. Thus by the law of mass conservation equation, the mass of NaCl in the draw solution will not change. Now, the initial concentration and volume of brine is  $C_0$  ( $C_0=1.06 \text{ M}$ ) and  $V_0$  respectively. We introduce a  $\phi$  value to represent the fraction of initial volume of feed solution over the initial volumes of both feed and draw solutions. Thus the initial volume of feed solution can be expressed as:  $[\phi/(1-\phi)]*V_0$ . In a variable- $\Delta P$  model, the  $\Delta P$  is continuously decreased. The process will only stop when initial volume of feed solution,  $[\phi/(1-\phi)]*V_0$ , completely permeate through the membrane. At the terminal status, the draw solution will be diluted to  $(1-\phi)*C_0$ .

18

At an intermediate time  $t$ , the  $C_0$  is diluted to  $C_t$  and the volume of the brine increases to  $V_t$ . After an infinitesimal period of time,  $dt$ , the concentration and volume is  $C_{t+dt}$  and  $V_{t+dt}$  respectively. We have:

$$C_0 * V_0 = C_t * V_t = C_{t+dt} * V_{t+dt} \quad (S4)$$

In the above equation the  $C_t$  and  $V_t$  fulfills the continuity of functions:

$$C_{t+dt} = (C_t + dC) \text{ and } V_{t+dt} = (V_t + dV) \quad (S5)$$

Furthermore, the dV can be re-written as:

$$dV = J_w * A_m * dt \quad (S6)$$

In which  $J_w$  is the trans-membrane water flux at time t,  $A_m$  is the effective area in operation. Combining equation (1-3) concludes:

$$C_t * V_t = (C_t + dC) * (V_t + J_w * A_m * dt) \quad (S7)$$

Rearranging equation (4) and ignore the second order infinitesimal term ( $J_w * A_m * dt * dC$ ) on the right, we have:

$$V_t * dC + C_t * J_w * A_m * dt = 0 \quad (S8)$$

Substituting equation (1) into equation (4), we have:

$$\left(\frac{C_0 V_0}{C_t}\right) * dC + C_t * J_w * A_m * dt = 0 \quad (S9)$$

Note that:

$$J_w * A_m * dt = dE / \Delta P \quad (S10)$$

Combining equation (6) and (7) we conclude the calculation of dE as a function of  $C_0$  and  $\Delta P$ :

$$dE = -C_0 V_0 * \frac{1}{C_t^2} * \Delta P * dC \quad (S11)$$

Integrating equation S11 from  $C_0$  (initial  $C_{D,b}$ ) to  $(1 - \phi) * C_0$  (final  $C_{D,b}$ ) we have:

$$E = -C_0 * \int_{C_0}^{(1-\phi)*C_0} (\Delta P / C_t^2) * dC \quad (S12)$$

#### Constant- $\Delta P$ model for the calculation of energy recovery rate

Following the model developed in a recent study (Yip and Elimelech, ES&T, 2012 (46), 5230–5239), the practical extractable work can be expressed as:

$$W_{p,\max} = \nu RT (1-\phi) (\sqrt{C_D^0} - \sqrt{C_F^0})^2 V_F^0 \quad (S13)$$

$$\phi \approx V_F^0 / (V_F^0 + V_D^0) \quad (S14)$$

Wherein,  $V_F^0$  is the initial volume of feed solution and  $V_D^0$  is the initial volume of draw solution. This  $W_{p,\max}$  stands for the maximum extractable work at a constant  $\Delta P$  for given volumes of feed solution and draw solution without considering the PRO membrane properties. In the above equation, the value of  $W_{p,\max}/V_F^0$  suggests the energy production per unit volume of feed solution.

In our study, the energy recovery rate is defined by energy production per unit volume of draw solution (i.e. seawater brine). To make the calculation comparable with the value in our study, we use a different form of the above equations by substituting equation S14 into equation S13:

$$W_{p,\max} = \Delta P * \Delta V^* = \nu RT \phi (\sqrt{C_D^0} - \sqrt{C_F^0})^2 V_D^0 \quad (S15)$$

In this equation, the  $W_{p,\max}/V_D^0$  is the energy production per unit volume of draw solution (seawater brine). Thus the physical meaning can be unified with its equivalent in the variable- $\Delta P$  model.



1 In the previous publication (Yip and Elimelech, ES&T, 2012 (46), 5230–5239), the  
2 parameter  $\phi$  was assigned a value of  $\phi=0.4$ . However in our revised manuscript we  
3 assign a value of 0.75, this is because the concentration of seawater brine  
4 (considering system recovery of 50%) is about 2 times of the concentration of  
5 seawater. It should be noted here that in the variable- $\Delta P$  model, the value of  
6  $\phi=0.75$  was also adopted.

7 **Calculation of Gibbs free mixing energy,  $\Delta G_{\text{mix}}$**

8 The  $\Delta G_{\text{mix}}$  is calculated based on a previous literature (Yip and Elimelech, ES&T,  
9 2012 (46), 5230–5239, Equation 5) in a modified form considering that  
10 ( $V_A/V_B \approx \phi/(1-\phi)$ ):

$$-\frac{\Delta G_{\text{mix}, V_B}}{vRT} \approx \left( \frac{c_M}{\phi} \ln c_M - c_A \ln c_A - \frac{1-\phi}{\phi} c_B \ln c_B \right) * \left( \frac{\phi}{1-\phi} \right) \quad (\text{S16})$$

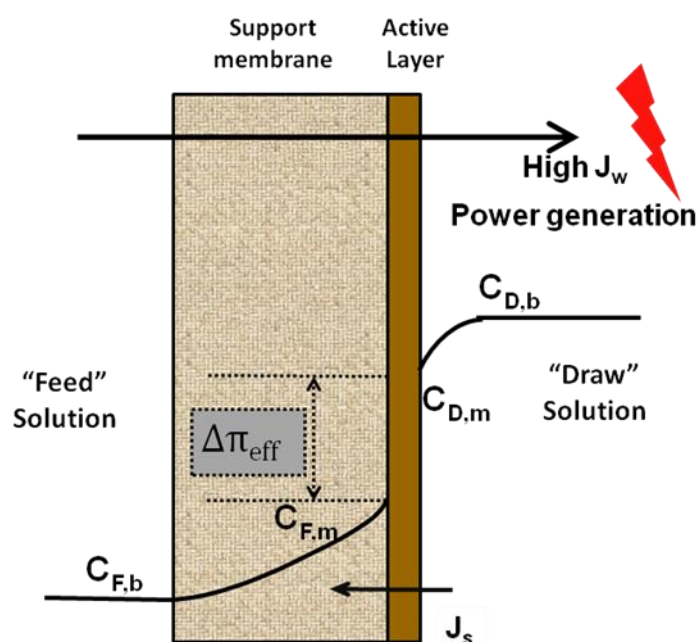

**Figure S1.** The schematic drawing of working principle of PRO membrane. Water flows naturally from low salinity feed solution ( $C_{F,b}$ ) to high salinity draw solution ( $C_{D,b}$ ). The water flux ( $J_w$ ) drives a turbine, which is mounted at draw solution side, to generate power. The ICP phenomenon causes solutes to accumulate within in support membrane, resulting in increased  $C_{F,m}$  at the membrane active layer. The ECP phenomenon causes solutes to be diluted at draw solution side, resulting in decreased  $C_{D,m}$  at the membrane active layer. As a result, the net osmotic pressure difference ( $\Delta\pi_{eff}$ ) across the active layer is decreased.

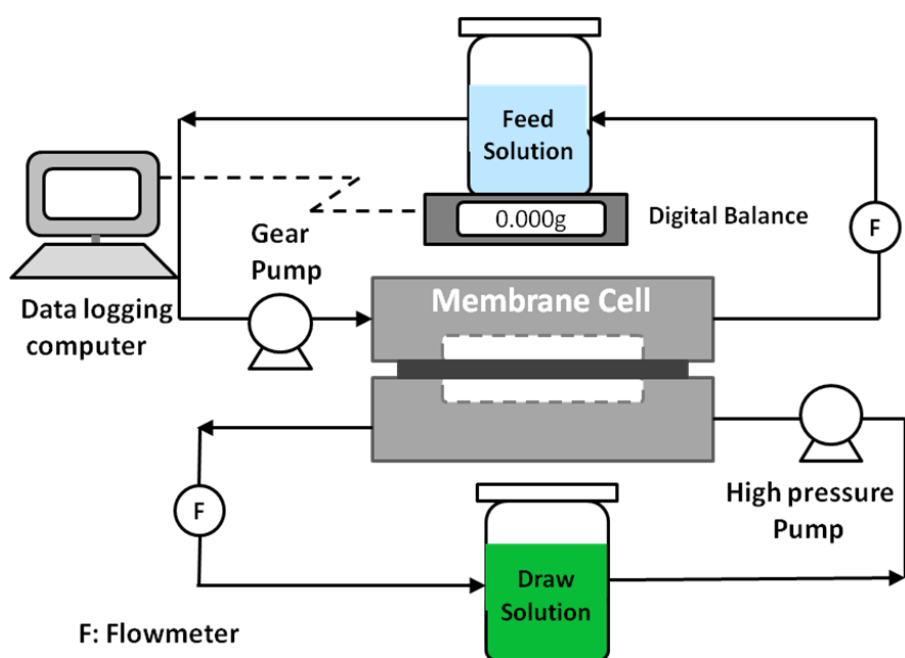

**Figure S2.** A schematic simplified diagram of lab-scale PRO system. The flow scheme of the draw solution and feed solution is counter-current in the membrane cell. The membrane cell is a modified stainless steel cross flow cell (GE SEPA II, Osmonics, effect area=140 cm<sup>2</sup>). The feed solution and draw solution tanks are equipped with a cooling system (not drawn in this diagram) to constantly maintain the temperature at 25 ± 1°C. A data logging balance measures the weight change of the feed solution, from which the  $J_w$  is calculated.

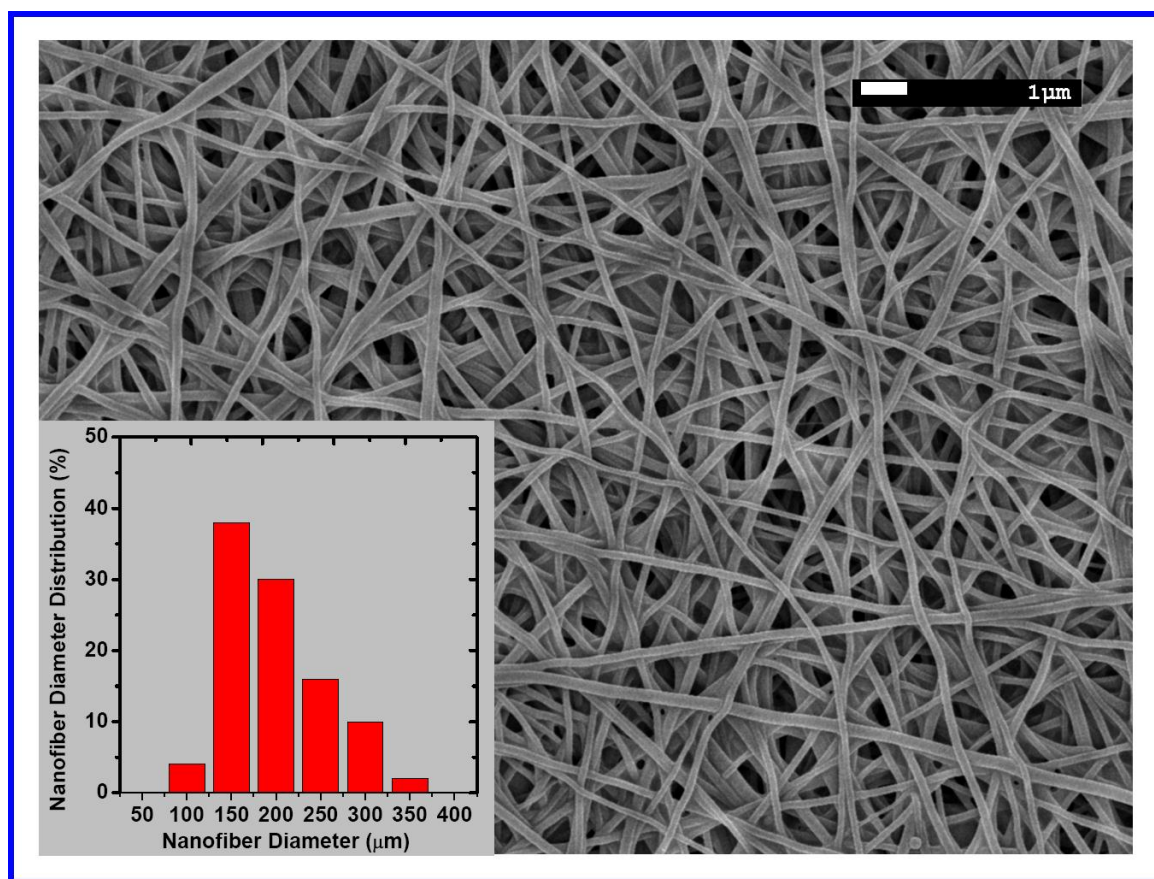

1

2 **Figure S3.** FESEM image of NSM top surface and its according nanofiber diameter distribution  
3 (inserted plot) with more than 70% nanofibers in the range of 100-200 nm and 98% nanofibers in the  
4 range of 100-300 nm.

5

1

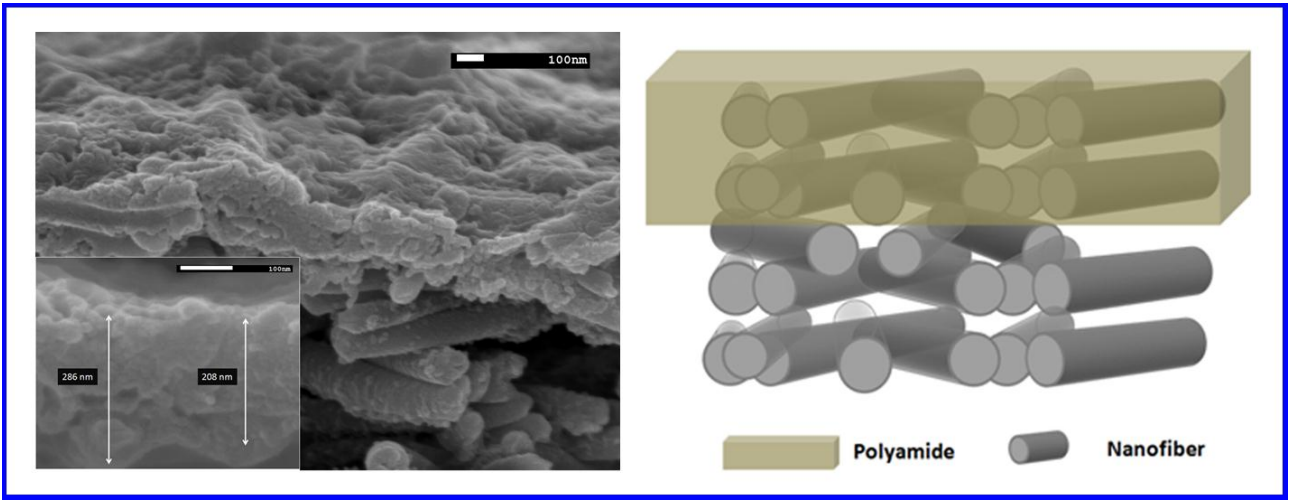

2

3 **Figure S4.** On the left is a typical FESEM high resolution image shows cross section of TNC-PRO  
4 membranes (top surface). The thickness of polyamide salt-rejecting layer is typically around  
5 200-300 nm. On the right is a schematic model showing 1-2 layers of nanofiber becomes  
6 “backbones” of the surface polyamide selective layer.

7

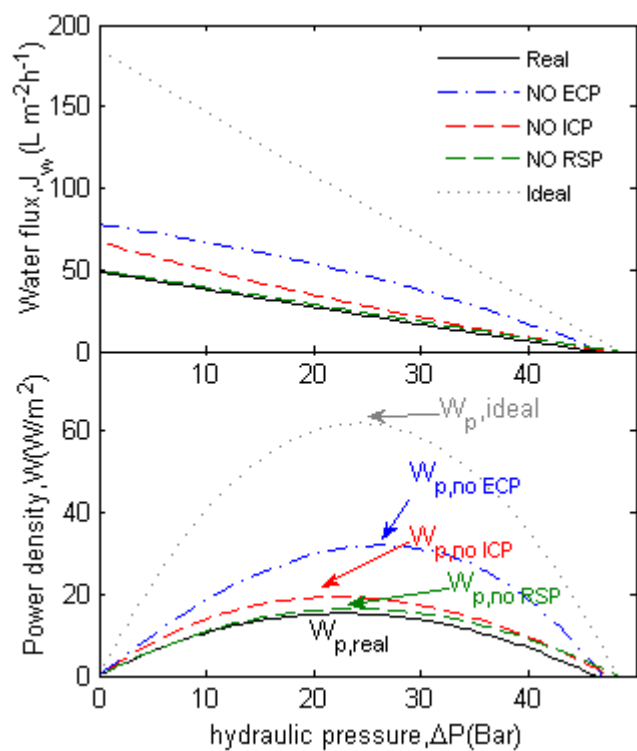

**Figure S5.** The  $J_w$  and  $W$  of TNC-2 PRO membranes as functions of  $\Delta P$ . The lowest black curve shows real  $J_w$  and  $W$  considering all deleterious effects of ECP, ICP and RSP, while highest dotted grey curve shows hypothetical  $J_w$  and  $W$  assuming all deleterious phenomena are absent. In between, the dashed green, red and blue lines represent  $J_w$  and  $W$  assuming no RSP (i.e.,  $B/J_w^*[\exp(J_w S/D) - \exp(-J_w/k)] = 0$ ), ICP (i.e.,  $\exp(J_w S/D) = 1$ ) or ECP (i.e.,  $\exp(-J_w/k) = 1$ ) respectively.

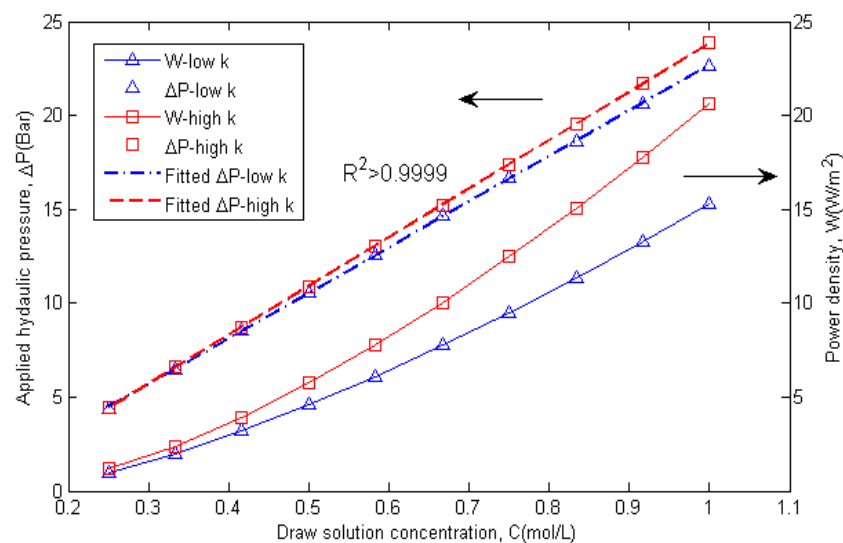

**Figure S6.** The relationships of optimum applied pressure  $\Delta P$  and  $W_p$  with  $C_{D,b}$ . The optimum applied pressure is linearly decreased with the decrease of  $C_{D,b}$ . The red color and blue color represents a high  $k$  value of  $180 \text{ L m}^{-2} \text{ h}^{-1}$  and a low  $k$  value of  $76.7 \text{ L m}^{-2} \text{ h}^{-1}$ , respectively.

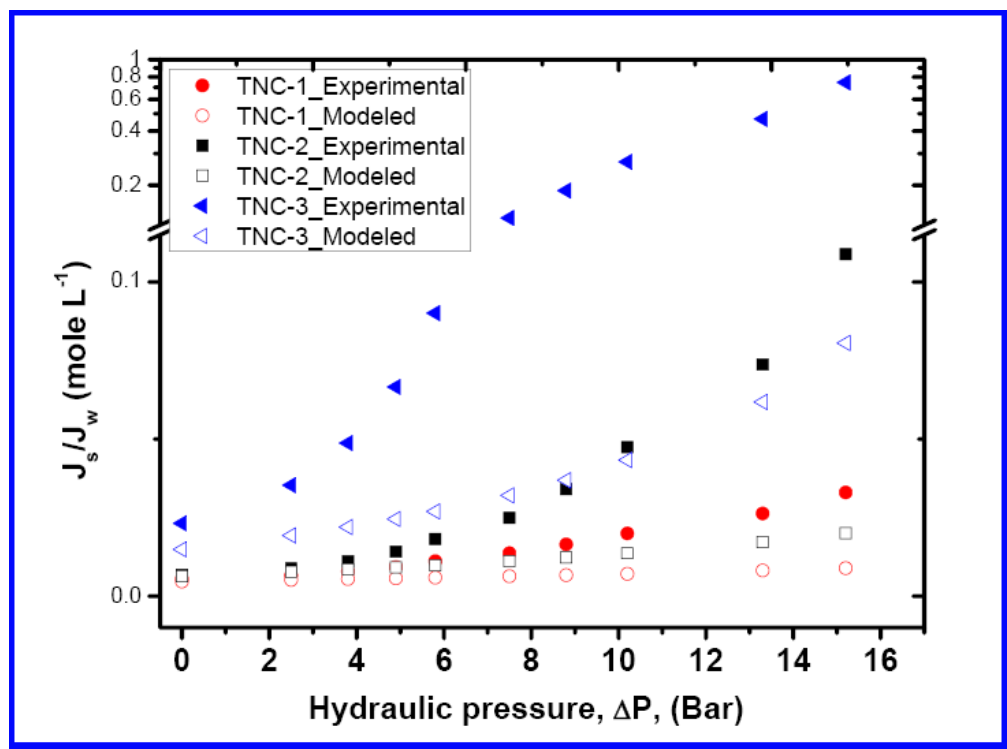

**Figure S7.** The specific reverse solute flux,  $J_s/J_w$ , versus the hydraulic pressure,  $\Delta P$ .

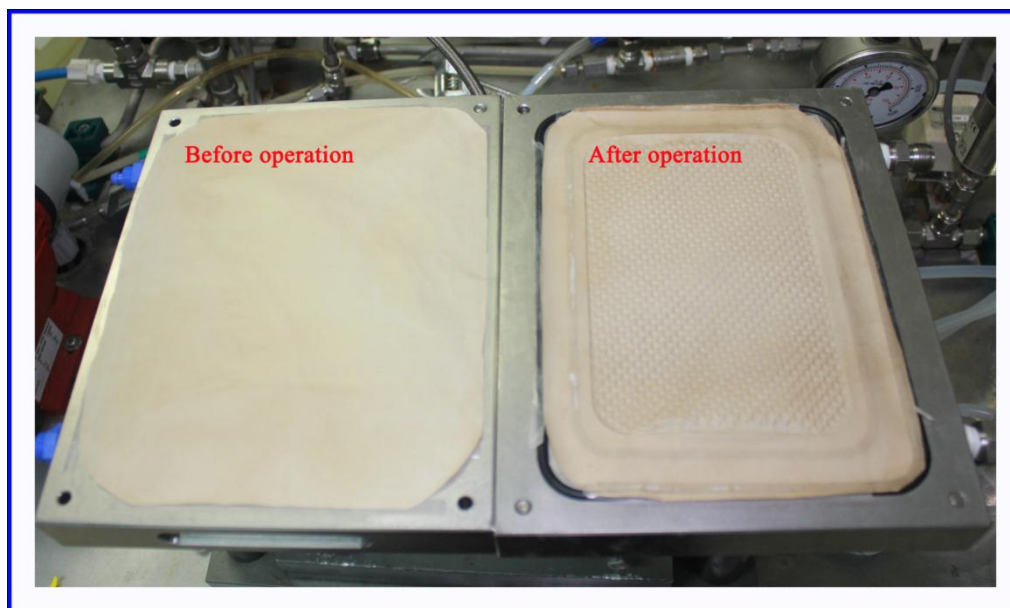

1

2 **Figure S8.** The appearance comparison of TNC-PRO membrane before (left) and after  
3 (right) PRO operation.

4

5



1

## 2 References

- 3 1. Song, X.; Liu, Z.; Sun, D. D., Nano Gives the Answer: Breaking the Bottleneck of Internal Concentration  
4 Polarization with a Nanofiber Composite Forward Osmosis Membrane for a High Water Production Rate. *Advanced*  
5 *Materials* **2011**, 23, (29), 3256-3260.
- 6 2. Yip, N. Y.; Tiraferri, A.; Phillip, W. A.; Schiffman, J. D.; Elimelech, M., High Performance Thin-Film Composite  
7 Forward Osmosis Membrane. *Environmental Science & Technology* **2010**, 44, (10), 3812-3818.
- 8 3. Yip, N. Y.; Elimelech, M., Performance Limiting Effects in Power Generation from Salinity Gradients by Pressure  
9 Retarded Osmosis. *Environmental Science & Technology* **2011**.
- 10 4. Loeb, S.; Van Hessen, F.; Shahaf, D., Production of energy from concentrated brines by pressure-retarded  
11 osmosis : II. Experimental results and projected energy costs. *Journal of Membrane Science* **1976**, 1, (1), 249-269.
- 12 5. Loeb, S.; Titelman, L.; Korngold, E.; Freiman, J., Effect of porous support fabric on osmosis through a  
13 Loeb-Sourirajan type asymmetric membrane. *Journal of Membrane Science* **1997**, 129, (2), 243-249.

14

15
